# Supplementary material for: Hecogenin a Plant Derived Small Molecule as an Antagonist to BACE-1: A Potential Target for Neurodegenerative Disorders
Source: MDPI journal article supplement (doi:10.3390/metabo13060758), 2023-06-16
Supplement: s1 [file s1]

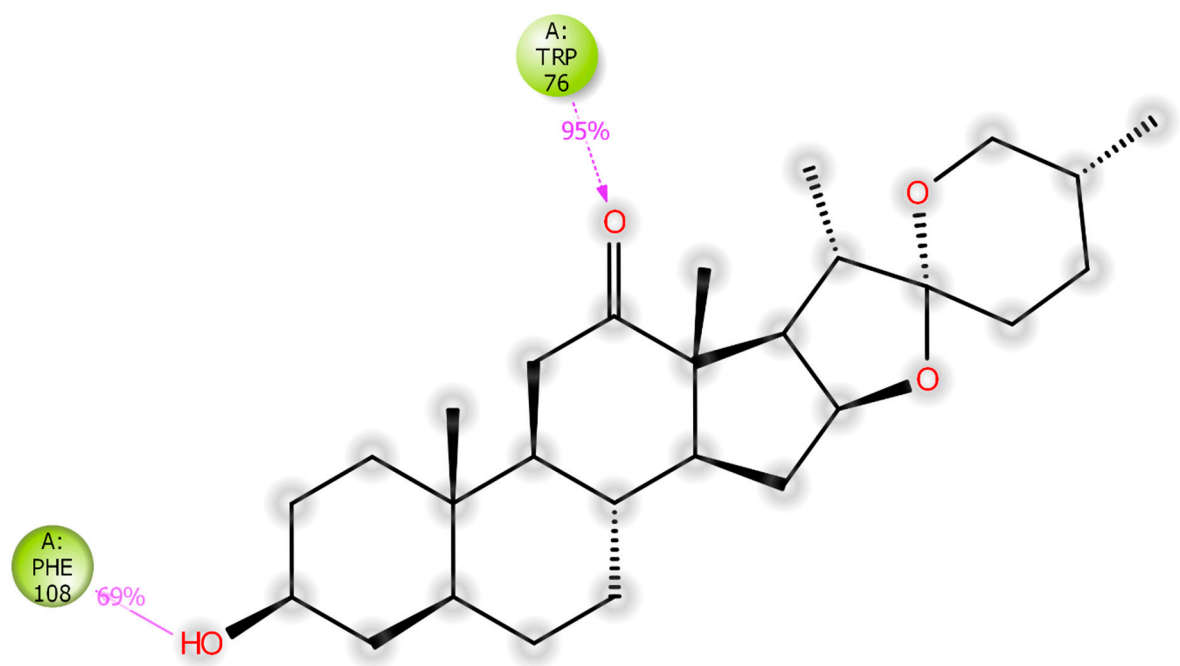

Supplementary Figure S1: Interactions of hecogenin with BACE-1

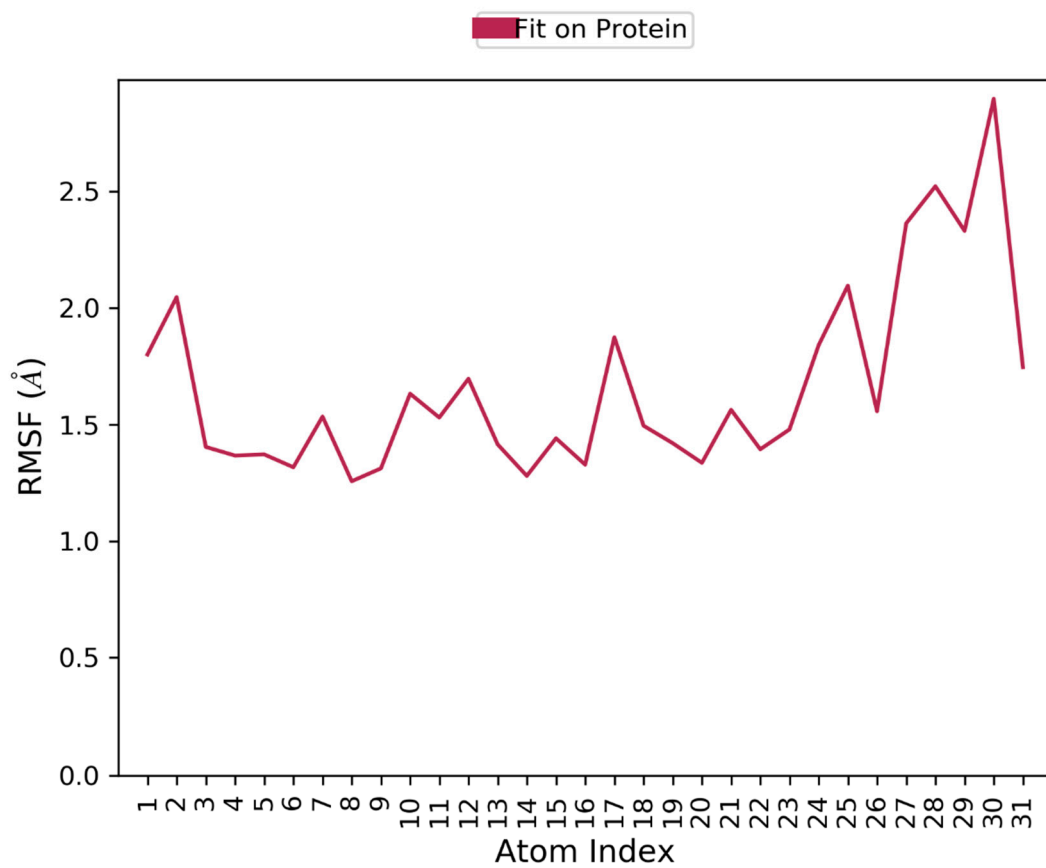

Supplementary Figure S2: Protein RMSF

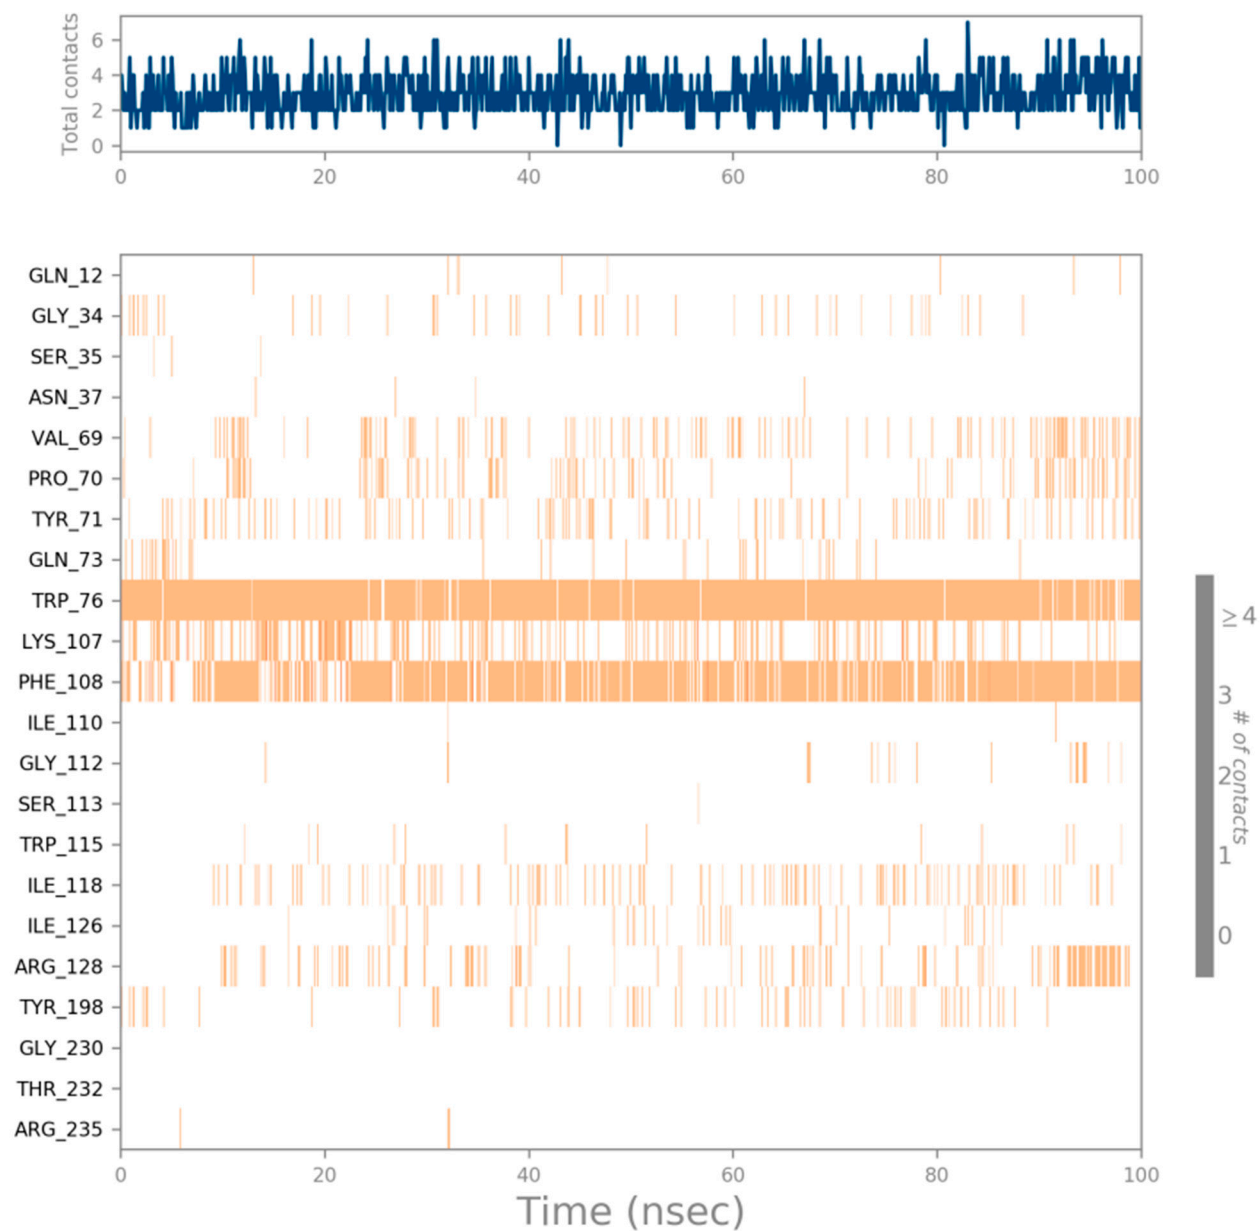

**Supplementary Figure S3: The number of ligand contacts with protein and the amino acid sites**
